# Supplementary material
Source: publisher figshare collection journal article supplement (https://acs.figshare.com/ndownloader/files/11005160)
Supplement: Supplementary file 1 [file 11005160]

Supplemental information for:

Formation of Particulate Matter from the Oxidation of Evaporated Hydraulic  
Fracturing Wastewater

**Jeffrey K. Bean<sup>1</sup>, Sahil Bhandari<sup>1</sup>, Anthony Bilotto<sup>2</sup>, and L. Hildebrandt Ruiz<sup>1\*</sup>**

<sup>1</sup>McKetta Department of Chemical Engineering, The University of Texas at Austin, Austin,  
Texas, 78712

<sup>2</sup>Covenant Testing Technologies LLC, Sugar Land, Texas, 77478

\* Correspondence to L. Hildebrandt Ruiz ([lh@che.utexas.edu](mailto:lh@che.utexas.edu))

**S1. Additional details on sample origin, collection and storage**

All samples were collected from the Wolfcamp shale formation in the Permian Basin: Samples 1-6 were collected in Ward County (Wolfcamp A Geology Zone); samples 7-9 were collected in Reeves County (Wolfcamp B Geology Zone) and samples 10-12 were collected in Reeves County (Wolfcamp A Geology Zone). All samples were collected from wells that produced both oil and gas during the flowback process before the first state reported well test date. Samples 1-3 were collected 5 days after fracturing, samples 4-6 were collected 8 days after fracturing the well, samples 7-9 were collected 11 days after fracturing the well and samples 10-12 were collected 1 day after fracturing the well. Samples 1, 4, 7 and 10 were collected directly from a separator during flowback; the other samples were collected from open-top flowback tanks. The samples were collected in cleaned amber 8 oz bottles purchased from Fisher Scientific (manufacturer: Qorpak™ GLC01948); bottles were filled completely and capped immediately

after collection. The bottles were shipped via Fedex first to Sugarland, TX and then to Austin, TX. Samples were stored in the amber bottles at room temperature.

## **S2. TVC measurement comparison, 1 year apart**

Table S1 shows TVC measurements taken of all samples 1 year apart. Overall the data show that TVC did decrease over time; the reason for an increase observed in sample 12 is unclear. The 2015 TVC measurement of sample 4 was conducted in triplicate and resulted in measurements of 109.1, 116.2, and 103.0. Thus, observed changes in TVC content over time cannot be explained by measurement uncertainty / variability.

Table S1. Comparison of TVC measurements taken 1 year apart. Units are in mgC L<sup>-1</sup>

|           | 2015  | 2016 | % decrease |
|-----------|-------|------|------------|
| sample 1  | 89.2  | 41.8 | 53%        |
| sample 2  | 27.3  | 23.2 | 15%        |
| sample 3  | 1.0   | 0.0  | 100%       |
| sample 4  | 103.0 | 91.6 | 11%        |
| sample 5  | 0.0   | 0.0  | 0%         |
| sample 6  | 21.8  | 14.8 | 32%        |
| sample 7  | 58.2  | 39.7 | 32%        |
| sample 8  | 52.4  | 38.2 | 27%        |
| sample 9  | 114.5 | 42.8 | 63%        |
| sample 10 | 24.2  | 20.6 | 15%        |
| sample 11 | 28.5  | 19.7 | 31%        |
| sample 12 | 10.9  | 19.4 | -79%       |

### S3. Molecular formulae of most abundant ions identified in gas and particle phases

Table S2 below lists the 20 most abundant ions identified in the gas and particle phases during Expt. 1 as summarized in Figure 2. Molecules are ionized by  $\text{H}^+$ ,  $\text{H}_3\text{O}^+$  or  $\text{H}_3\text{O}^+$  - water clusters. The ion formulae provided in Table S2 are as measured: the molecular formulae of the analytes are ambiguous to within multiples of  $\text{H}_2\text{O}$ . Double bond equivalency (DBE) is calculated assuming  $\text{H}^+$  - ionization. However, since the identity of the reagent cluster is unknown, DBE is not discussed here or in the main text, and the discussion in the main text is focused on carbon number.

The ~~Most~~ time series of most gas-phase species exhibit a monotonic increase for the duration of the photo-oxidation period shown in Figure 2. One ion ( $\text{C}_6\text{H}_9\text{O}_2$ ) exhibits increases quickly and then decreases. We speculate that this trend is due to the formation of dimers from this C6 compound, as we detected several C12 compounds in the particle phase, as well as an overall indication of the importance of oligomerization reactions.

Table S2: Molecular formulae and double bond equivalency (DBE) of major ions shown in Figure 2

| Gas phase (Fig 2a)                    | DBE |  | Particle phase (Fig 2b)                      | DBE |
|---------------------------------------|-----|--|----------------------------------------------|-----|
| $\text{C}_5\text{H}_9\text{O}_2^+$    | 2   |  | $\text{C}_{11}\text{H}_{19}\text{O}_8^+$     | 3   |
| $\text{C}_5\text{H}_9\text{O}_3^+$    | 2   |  | $\text{C}_{12}\text{H}_{21}\text{O}_8^+$     | 3   |
| $\text{C}_6\text{H}_9\text{O}_2^+$    | 3   |  | $\text{C}_{12}\text{H}_{22}\text{NO}_{10}^+$ | 3   |
| $\text{C}_6\text{H}_{11}\text{O}^+$   | 2   |  | $\text{C}_{13}\text{H}_{24}\text{NO}_5^+$    | 3   |
| $\text{C}_6\text{H}_{11}\text{O}_2^+$ | 2   |  | $\text{C}_{14}\text{H}_{17}\text{O}_5^+$     | 7   |
| $\text{C}_6\text{H}_{11}\text{O}_3^+$ | 2   |  | $\text{C}_{14}\text{H}_{24}\text{NO}_5^+$    | 4   |

| Gas phase (Fig 2a) | DBE |  | Particle phase (Fig 2b) | DBE |
|--------------------|-----|--|-------------------------|-----|
| C7H13O+            | 2   |  | C14H25O8+               | 3   |
| C7H13O2+           | 2   |  | C14H26NO9+              | 3   |
| C8H13O2+           | 3   |  | C14H28NO9+              | 2   |
| C8H13O3+           | 3   |  | C14H30NO9+              | 1   |
| C8H15O+            | 2   |  | C15H19O6+               | 7   |
| C8H15O2+           | 2   |  | C15H30NO9+              | 2   |
| C9H15O2+           | 3   |  | C16H29O8+               | 3   |
| C9H17O+            | 2   |  | C16H30NO10+             | 3   |
| C9H17O2+           | 2   |  | C17H23O4+               | 7   |
| C10H17O2+          | 3   |  | C18H28NO7+              | 6   |
| C10H19O+           | 2   |  | C19H27O6+               | 7   |
| C10H19O2+          | 2   |  | C19H28NO7+              | 7   |
| C11H21O+           | 2   |  | C20H27O5+               | 8   |
| C11H21O2+          | 2   |  | C23H25O2+               | 12  |

#### S4. NO<sub>x</sub> and HONO concentrations at the beginning and end of each experiment

Table S3 lists NO<sub>x</sub> concentrations at the beginning and end of each experiment, and an estimate of HONO concentrations at the beginning of every experiment. Total NO<sub>x</sub> decreased by approximately 40% in each experiment due to the formation of HNO<sub>3</sub> and organic nitrates. High levels of NO<sub>x</sub> were used in all experiments – the effects of these high NO<sub>x</sub> levels on predicted ammonium nitrate formation are evaluated via box modeling as discussed in the main text.

Table S3. NO<sub>x</sub> and HONO concentrations at the beginning and end of each experiment

| Exp. # | [NO <sub>x</sub> ] <sub>0</sub><br>(ppb) | [NO] <sub>0</sub><br>(ppb) | [NO <sub>2</sub> ] <sub>0</sub><br>(ppb) | *[HONO] <sub>0</sub><br>(ppb) | [NO <sub>x</sub> ] <sub>f</sub><br>(ppb) | [NO <sub>x</sub> ] <sub>f</sub> -<br>[NO <sub>x</sub> ] <sub>0</sub> |
|--------|------------------------------------------|----------------------------|------------------------------------------|-------------------------------|------------------------------------------|----------------------------------------------------------------------|
| 1      | 744                                      | 160                        | 146                                      | 438                           | 517                                      | 39%                                                                  |
| 2      | 411                                      | 100                        | 80                                       | 231                           | 291                                      | 39%                                                                  |
| 3      | 457                                      | 47                         | 44                                       | 366                           | 317                                      | 34%                                                                  |
| 4      | 754                                      | 96                         | 88                                       | 570                           | 507                                      | 38%                                                                  |
| 5      | 642                                      | 126                        | 125                                      | 391                           | 449                                      | 37%                                                                  |
| 6      | 732                                      | 114                        | 114                                      | 504                           | 478                                      | 41%                                                                  |
| 7      | 351                                      | 38                         | 32                                       | 281                           | 228                                      | 39%                                                                  |
| 8      | 790                                      | 58                         | 95                                       | 637                           | 522                                      | 37%                                                                  |
| 9      | 493                                      | 63                         | 78                                       | 352                           | 330                                      | 38%                                                                  |
| 10     | 440                                      | 143                        | 97                                       | 200                           | 320                                      | 40%                                                                  |
| 11     | 210                                      | 18                         | 13                                       | 179                           | 137                                      | 38%                                                                  |
| 12     | 818                                      | 136                        | 142                                      | 540                           | 569                                      | 37%                                                                  |

\* estimated using the difference of initial NO<sub>2</sub> measured by the chemiluminescent NO<sub>x</sub> monitor and the CAPS NO<sub>2</sub> monitor
